# Supplementary material for: Dynamics of preventive vs post-diagnostic cancer control using low-impact measures
Source: eLife journal article supplement (doi:10.7554/elife.06266), 2015-06-25
Supplement: supp [file elife-06266-supp-v1.zip]

Archive with 12 entries (12 files):
- elife_poa_e06266_Figure_3_figure_supplement_2.pdf
- elife_poa_e06266_Figure_2_figure_supplement_1.pdf
- elife_poa_e06266_Figure_2_figure_supplement_2.pdf
- elife_poa_e06266_Figure_3_figure_supplement_5.pdf
- elife_poa_e06266_Figure_3_figure_supplement_1.pdf
- elife_poa_e06266_Figure_3_figure_supplement_3.pdf
- elife_poa_e06266_Figure_3_figure_supplement_4.pdf
- elife_poa_e06266_Video_1.mp4
- elife_poa_e06266_Figure_5_figure_supplement_2.pdf
- elife_poa_e06266_Figure_5_figure_supplement_3.pdf
- elife_poa_e06266_Video_2.mp4
- elife_poa_e06266_Figure_5_figure_supplement_1.pdf
