# Supplementary material for: Dynamics of preventive vs post-diagnostic cancer control using low-impact measures
Source: eLife journal article supplement (doi:10.7554/elife.06266), 2015-06-25

A

Initially failed prevention  
before and after resection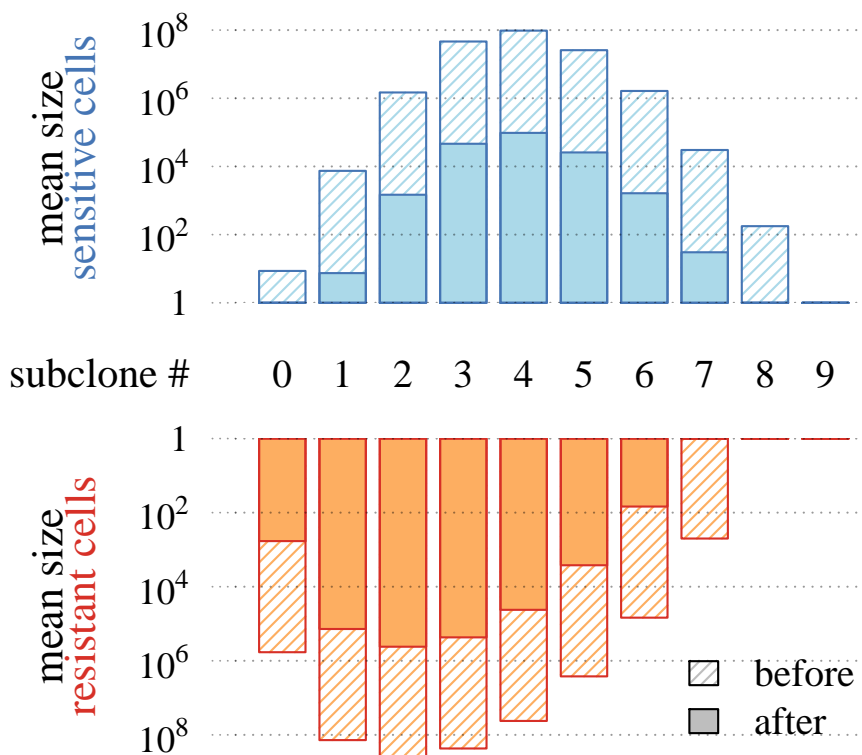

B

Post-diagnostic discovery  
before and after resection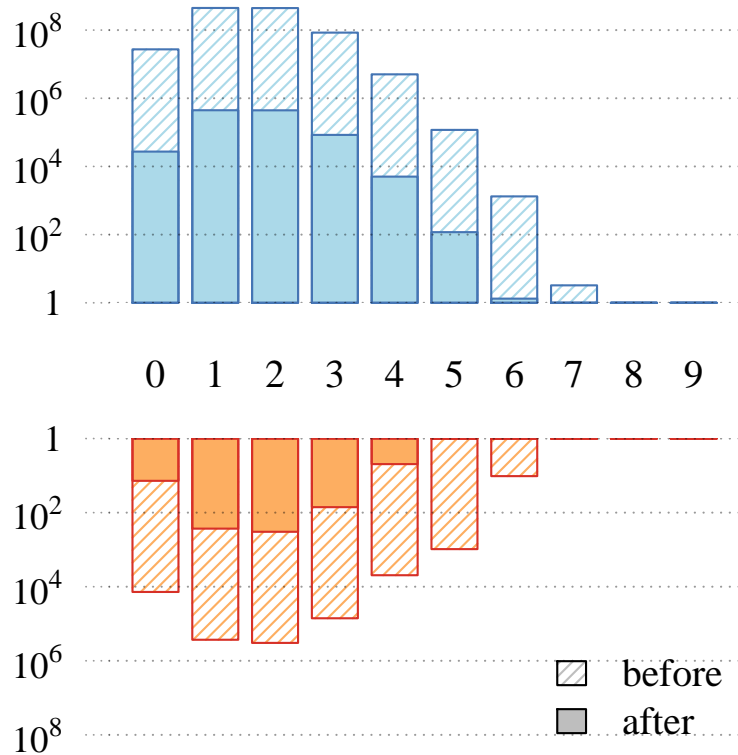

C

## Secondary failed prevention

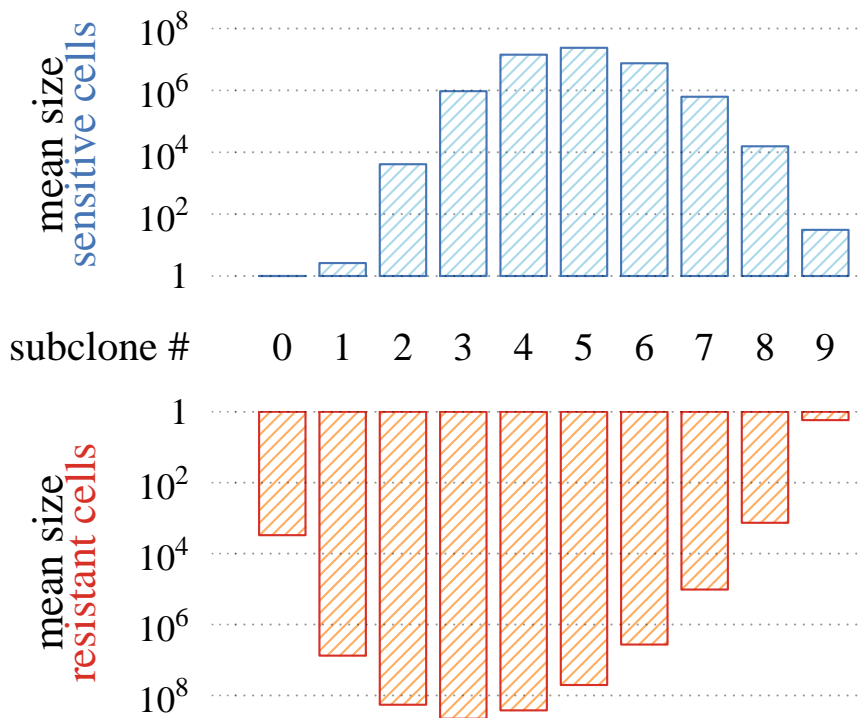

D

Primary failed  
post-diagnostic treatment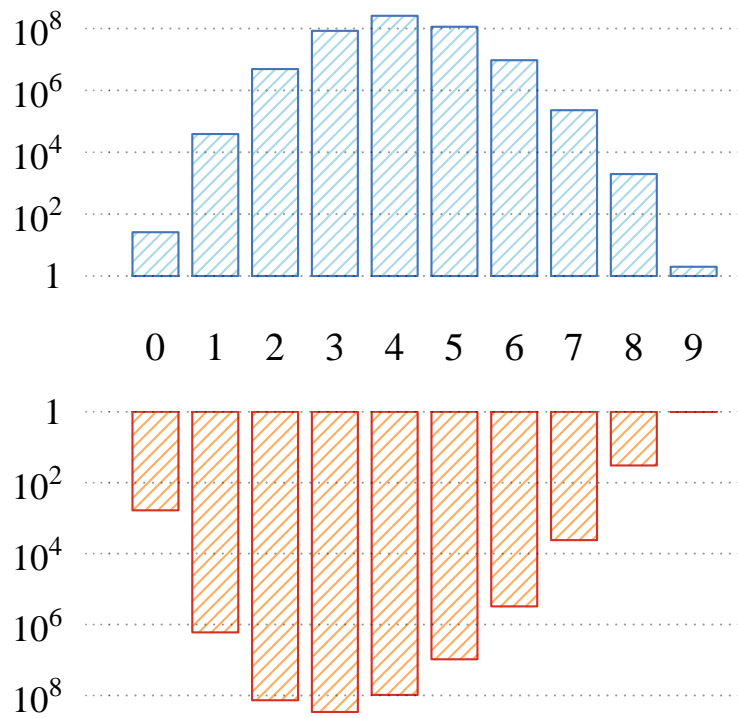

Supplement: supp [file elife-06266-supp-v1.zip › elife_poa_e06266_Figure_5_figure_supplement_2.pdf]
