# Supplementary figures and images for: Dynamics of preventive vs post-diagnostic cancer control using low-impact measures
Source: eLife journal article supplement (doi:10.7554/elife.06266), 2015-06-25

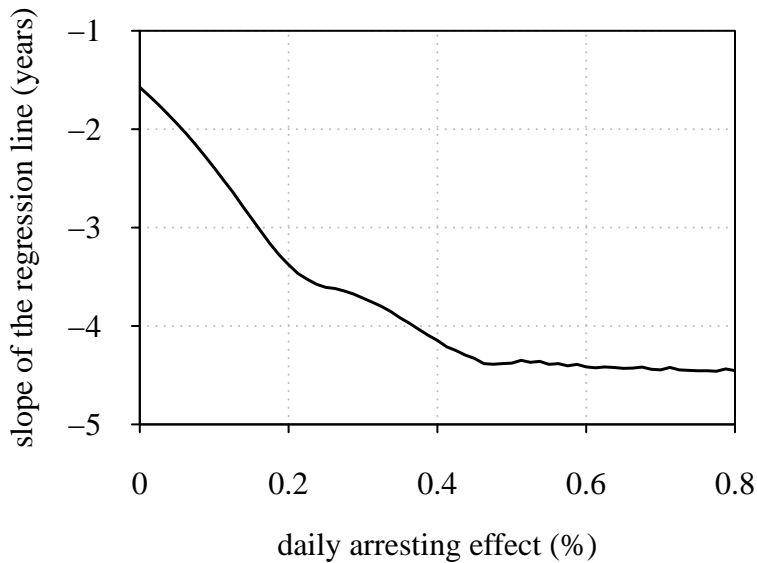

Supplement: supp [file elife-06266-supp-v1.zip]

A

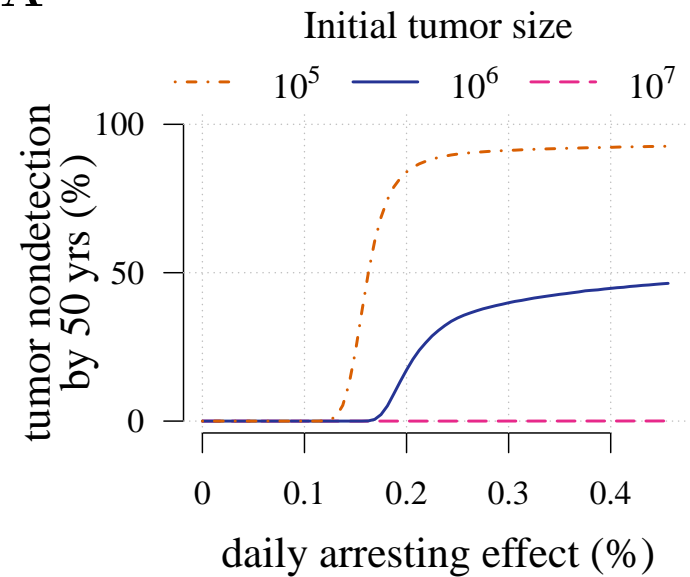

B

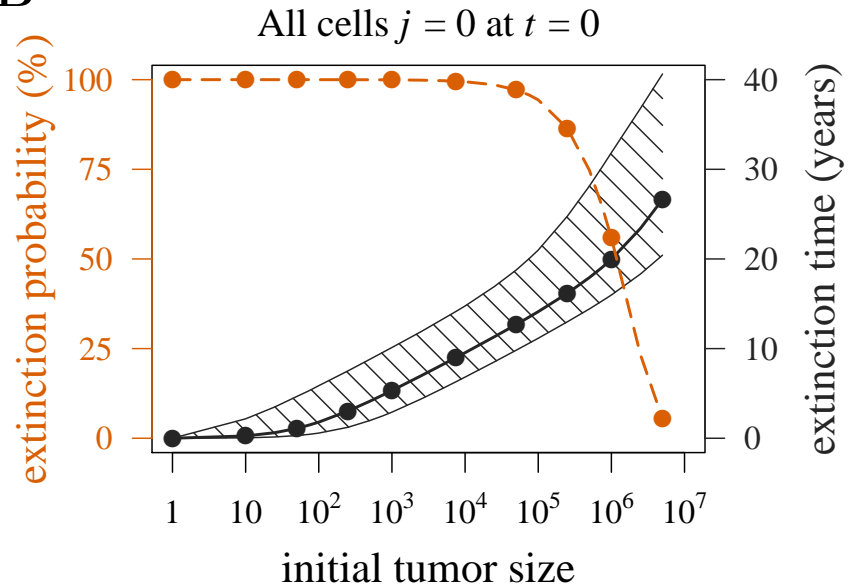

C

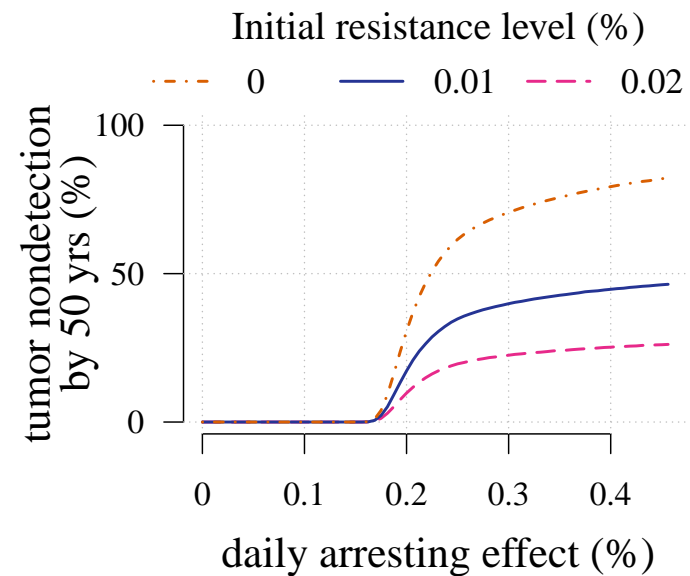

Supplement: supp [file elife-06266-supp-v1.zip]

A

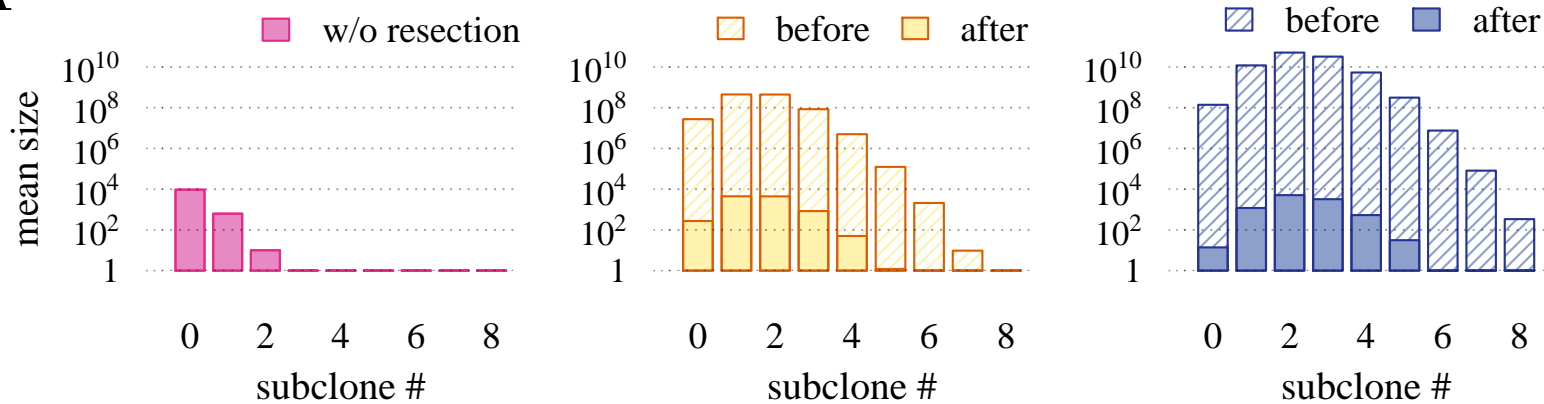

B

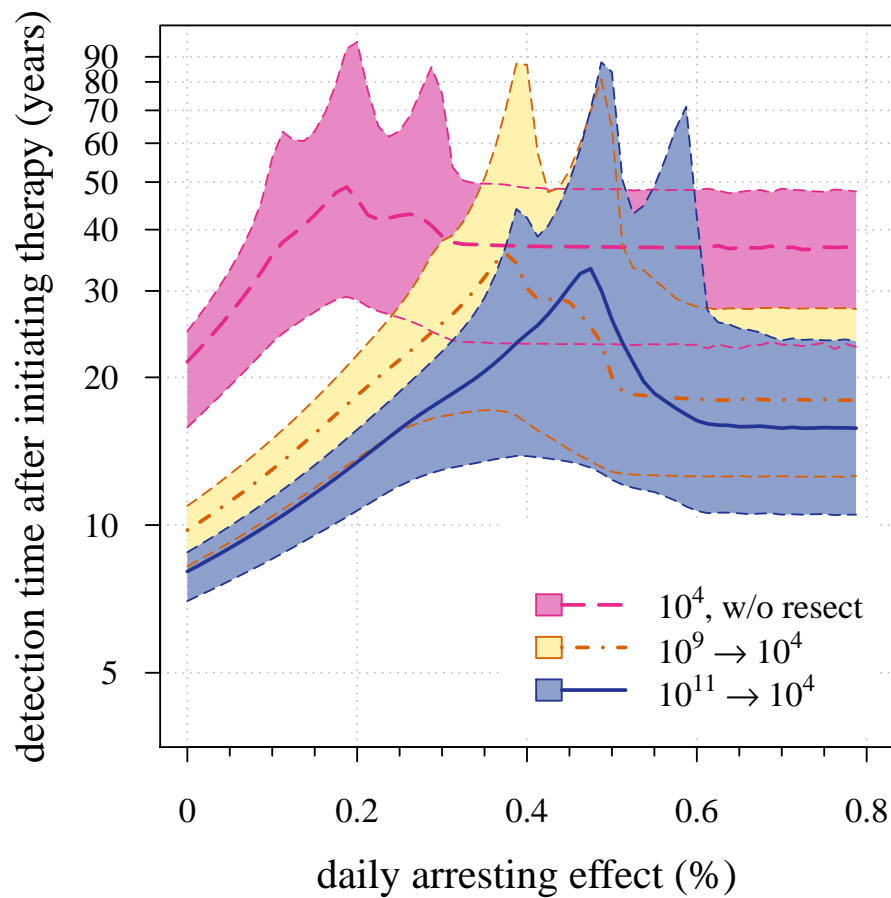

C

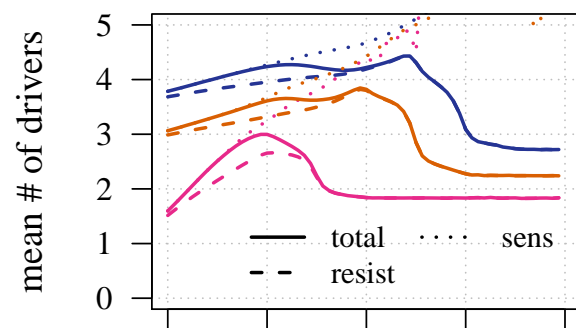

D

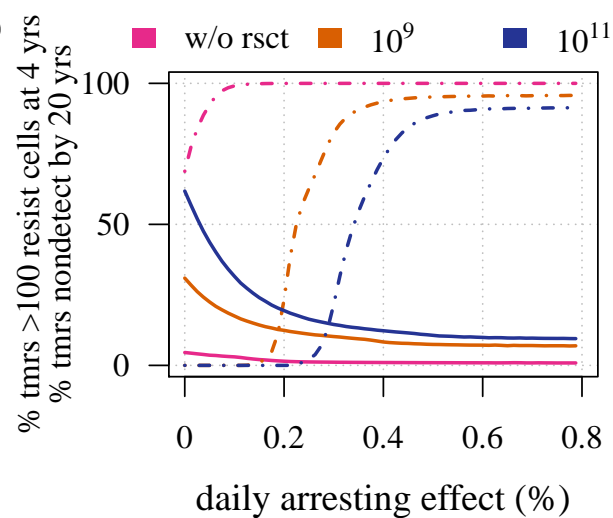

Supplement: supp [file elife-06266-supp-v1.zip]

A

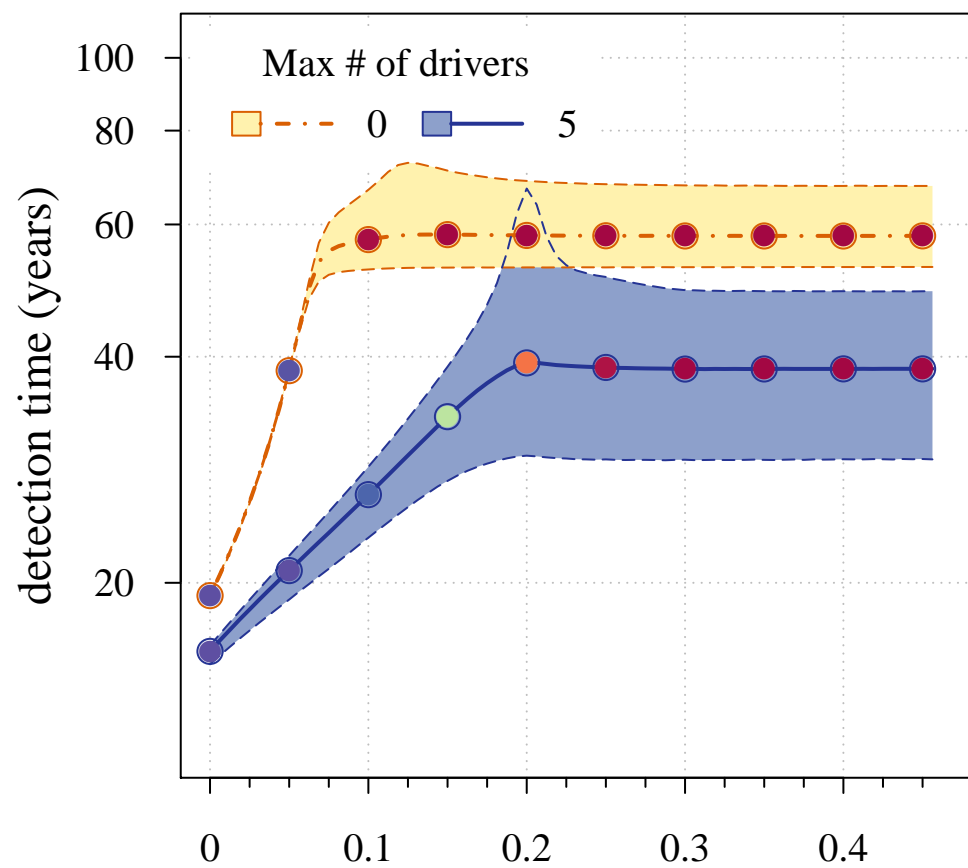

B

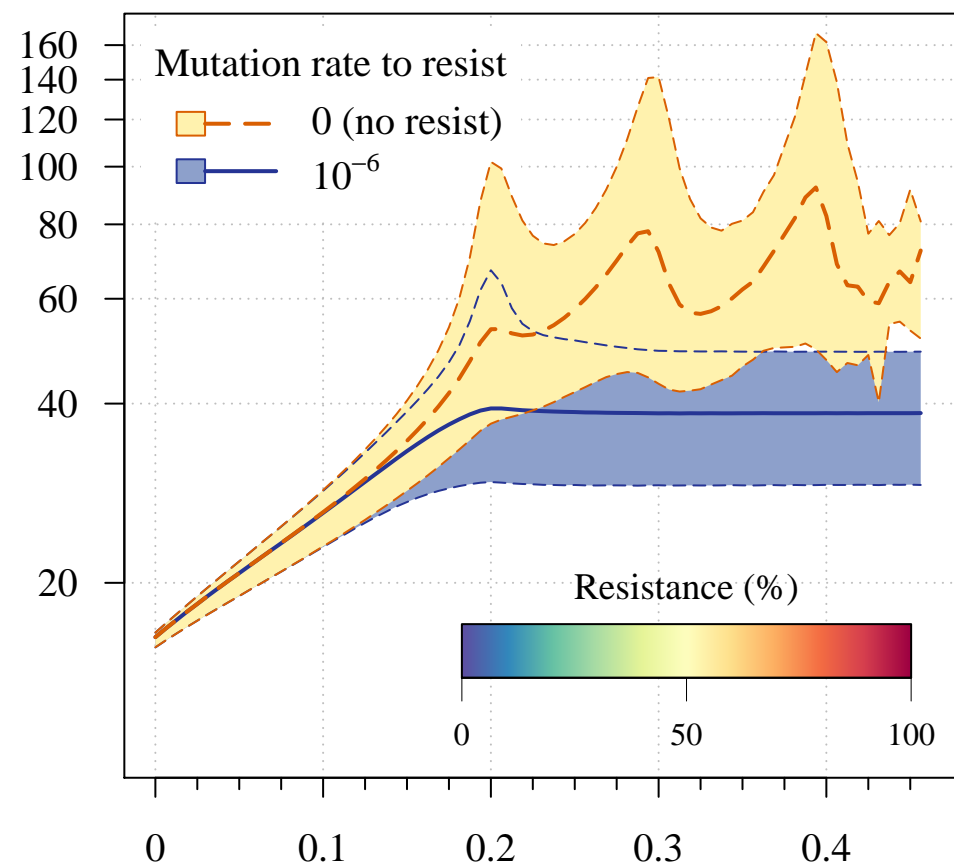

C

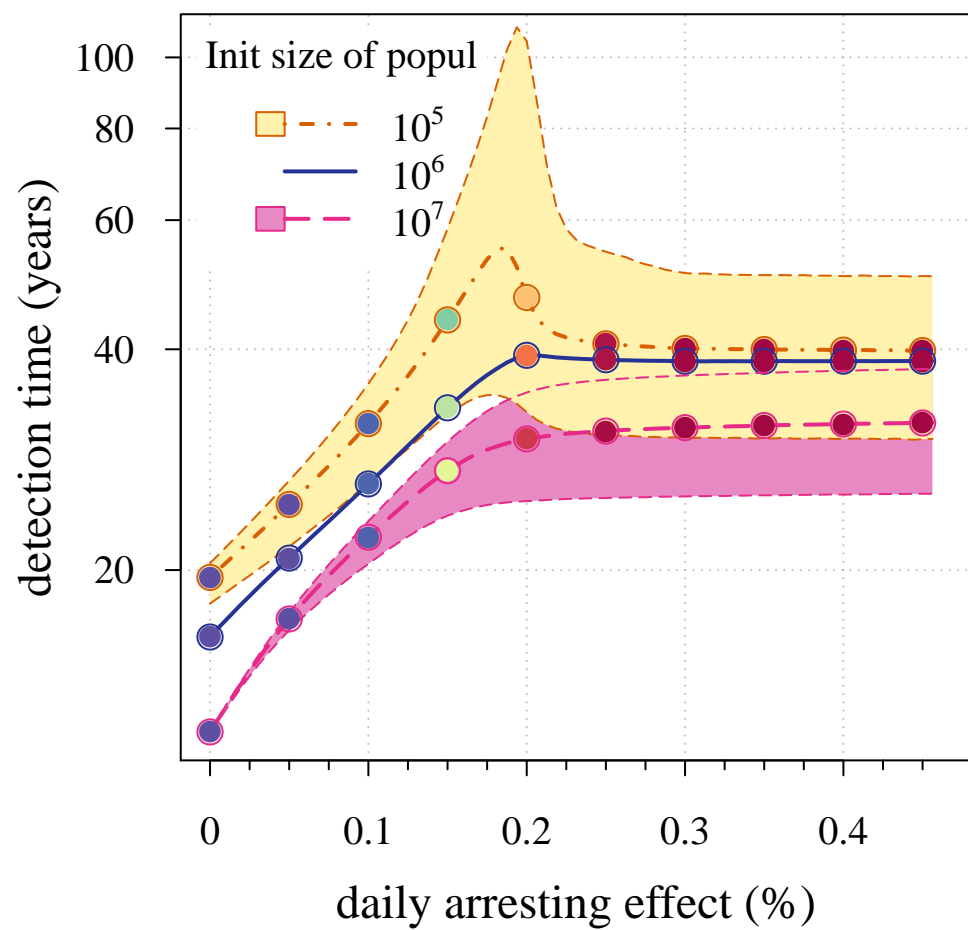

D

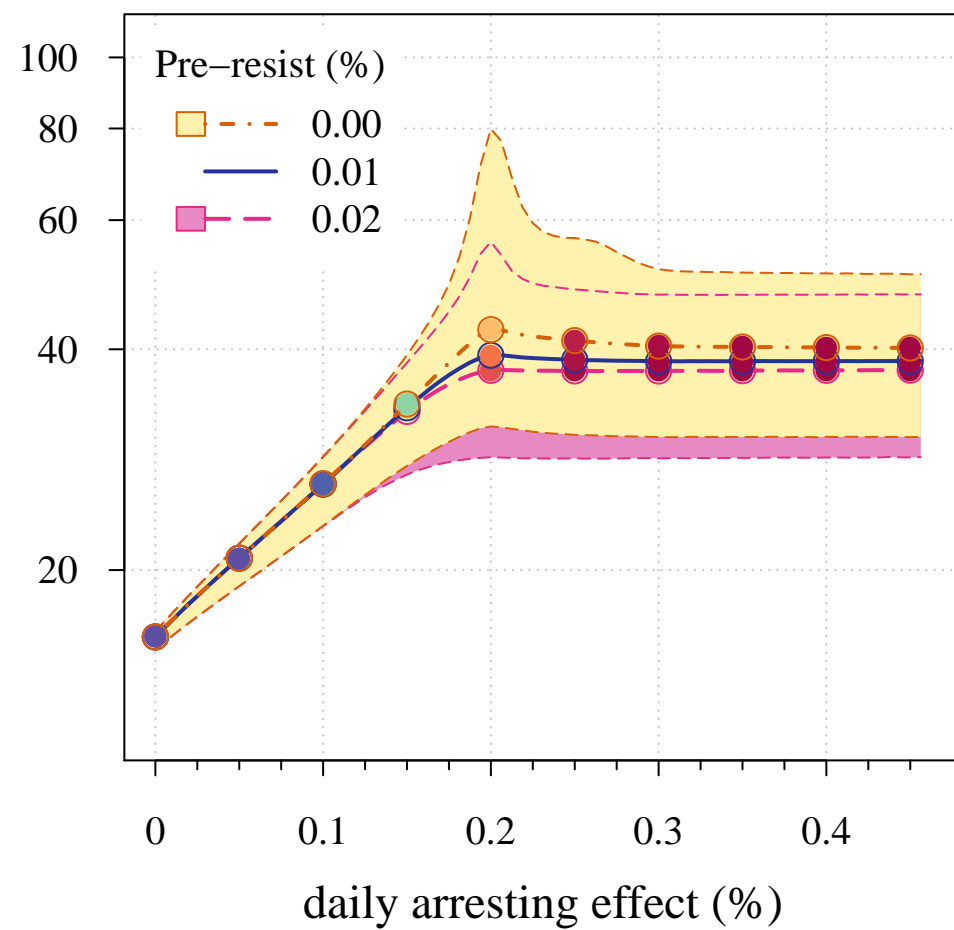

Supplement: supp [file elife-06266-supp-v1.zip]

A

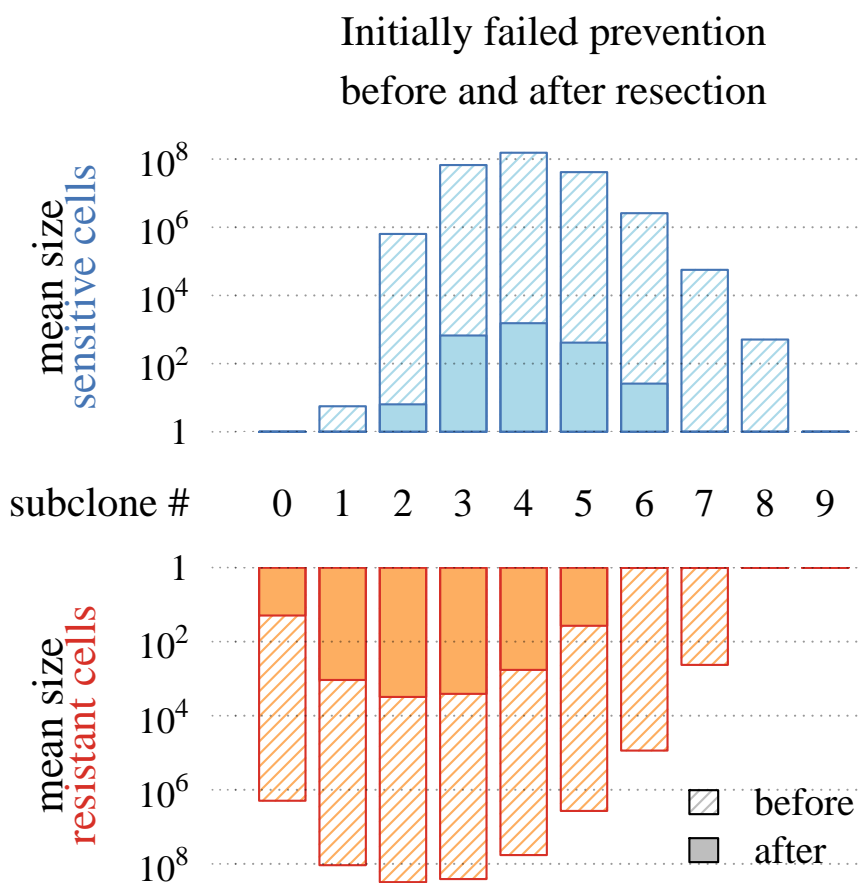

B

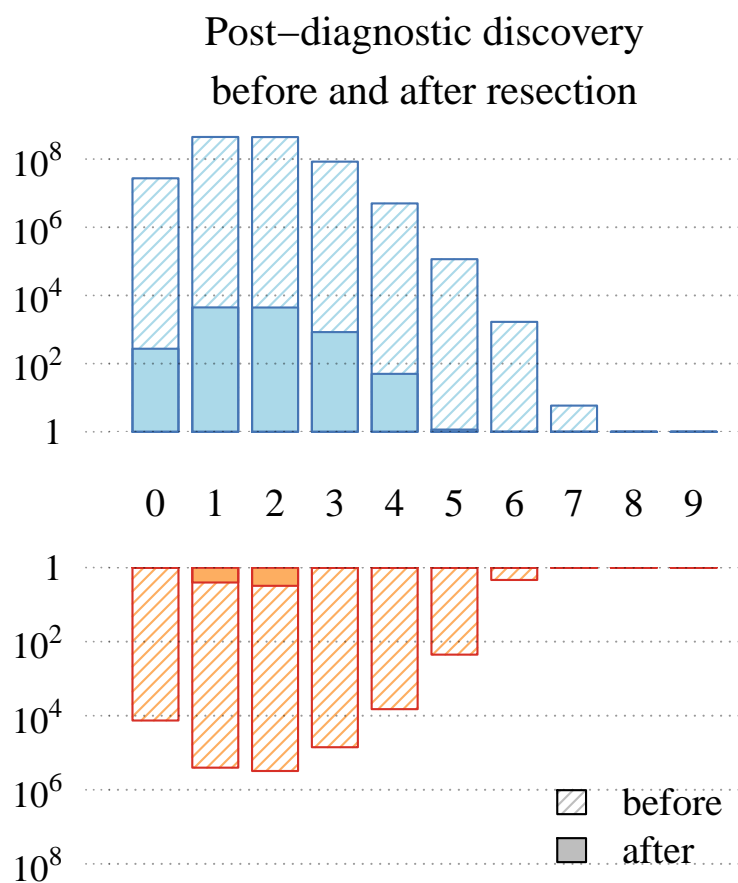

C

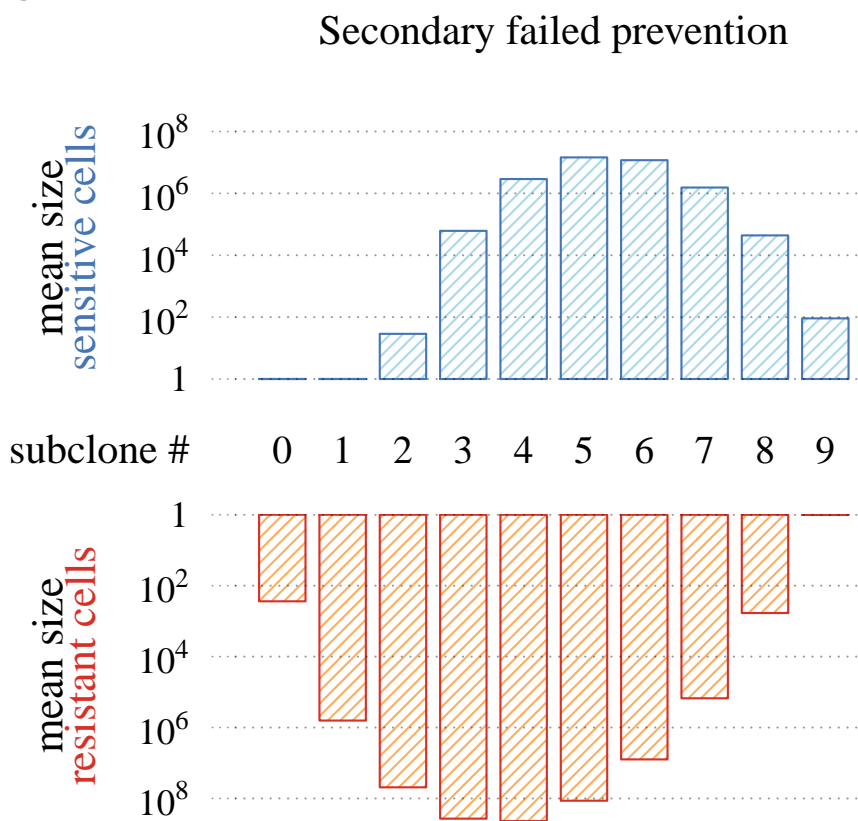

D

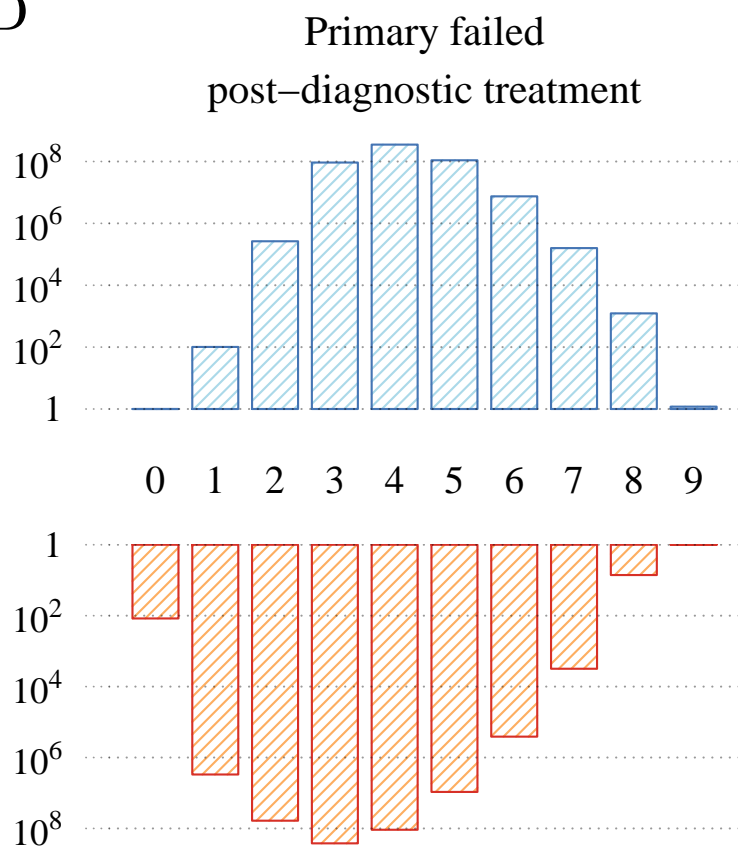

Supplement: supp [file elife-06266-supp-v1.zip]

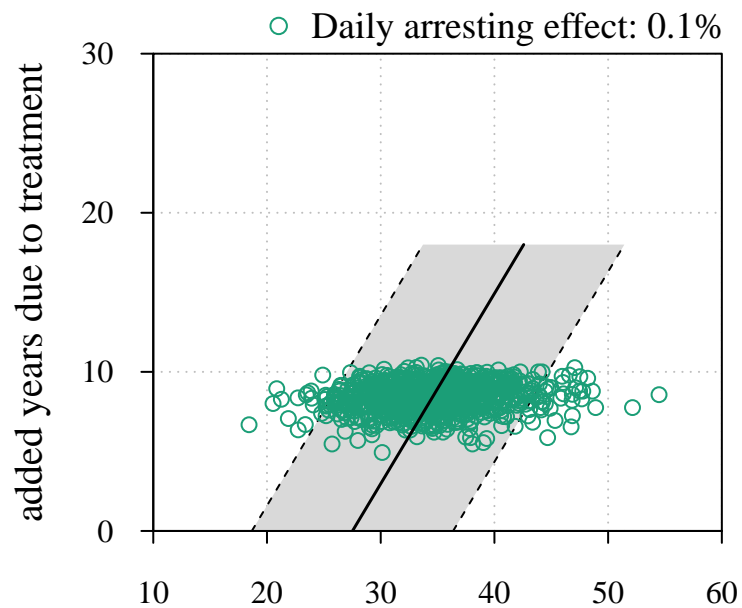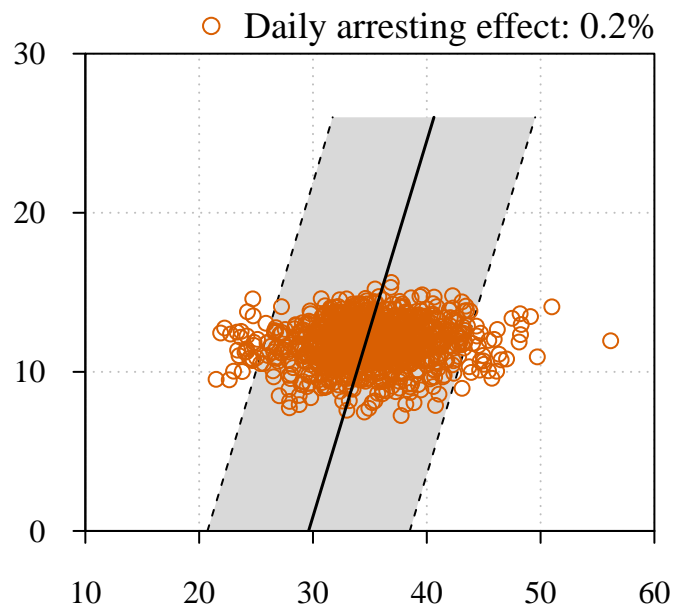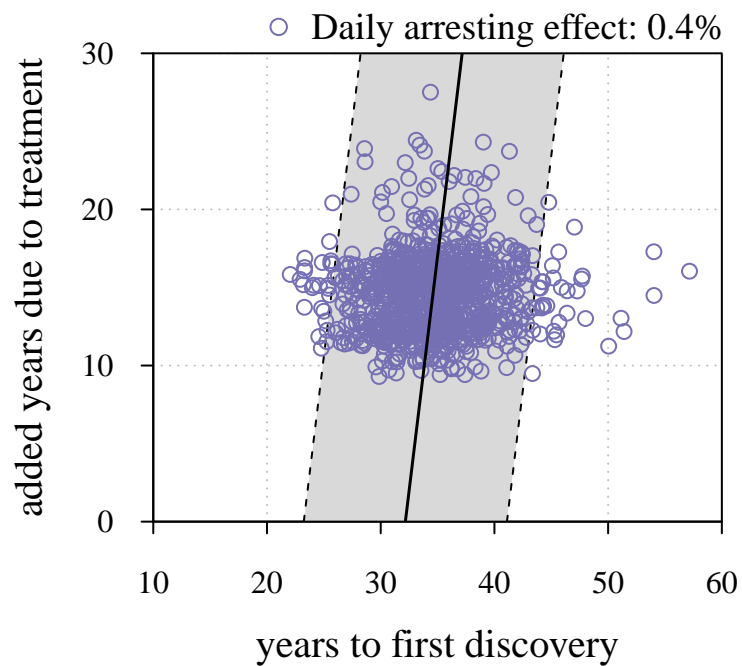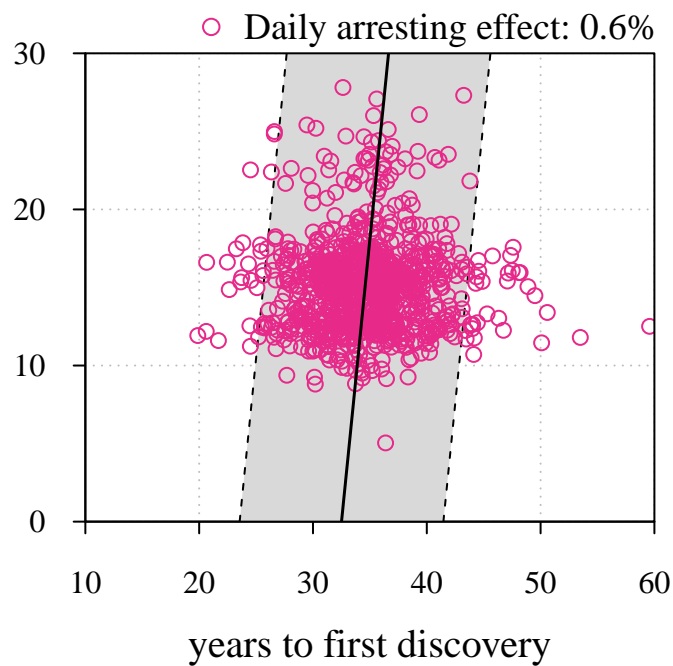

Supplement: supp [file elife-06266-supp-v1.zip › elife_poa_e06266_Figure_3_figure_supplement_2.pdf]

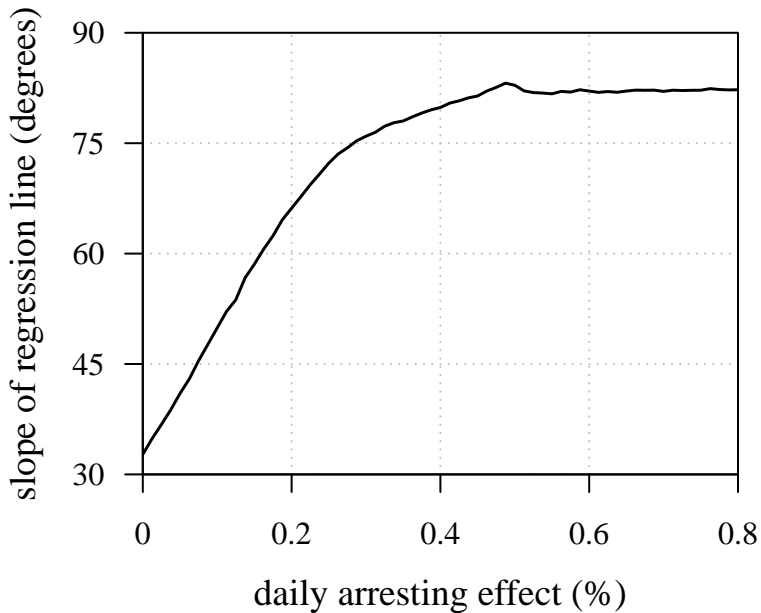

Supplement: supp [file elife-06266-supp-v1.zip › elife_poa_e06266_Figure_3_figure_supplement_3.pdf]

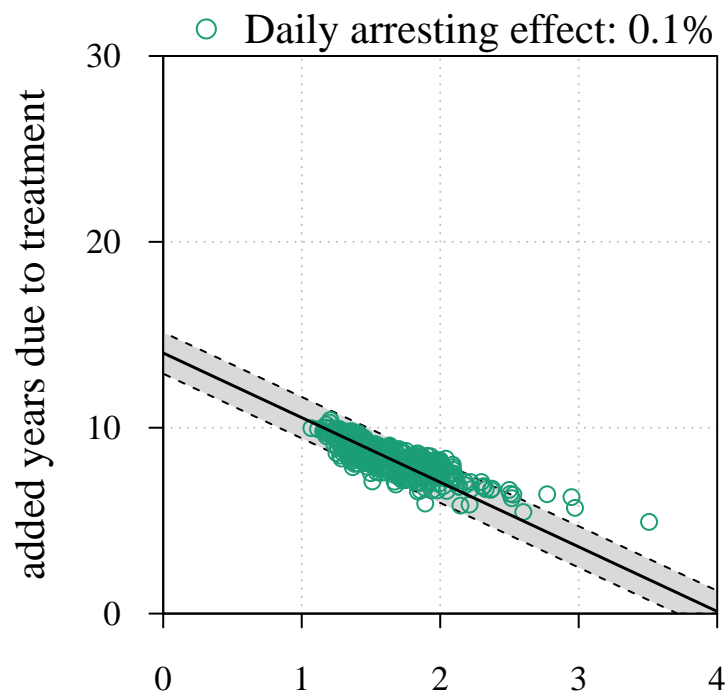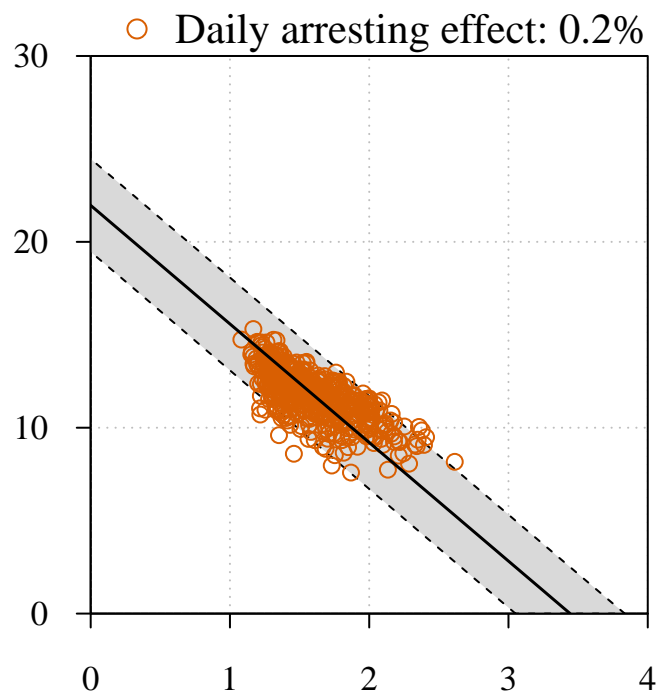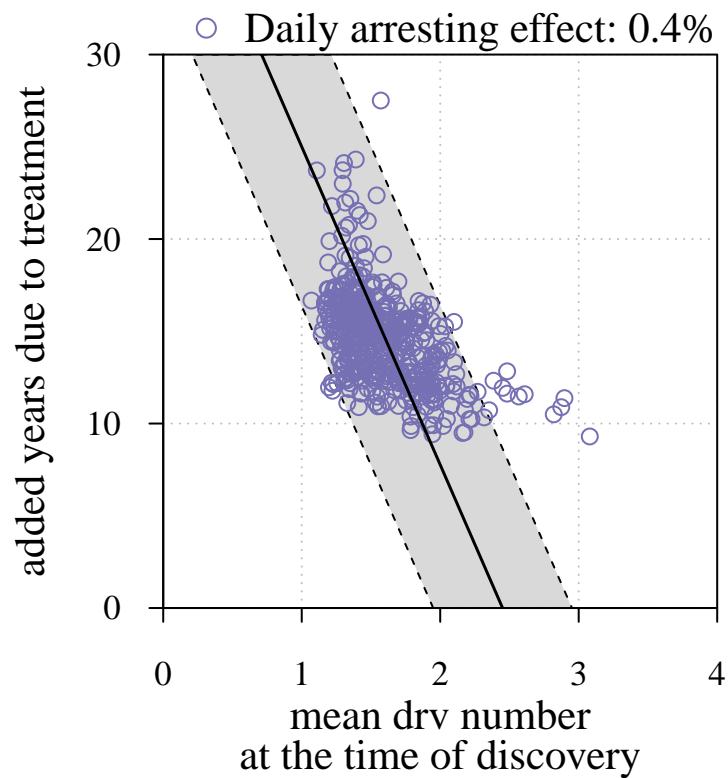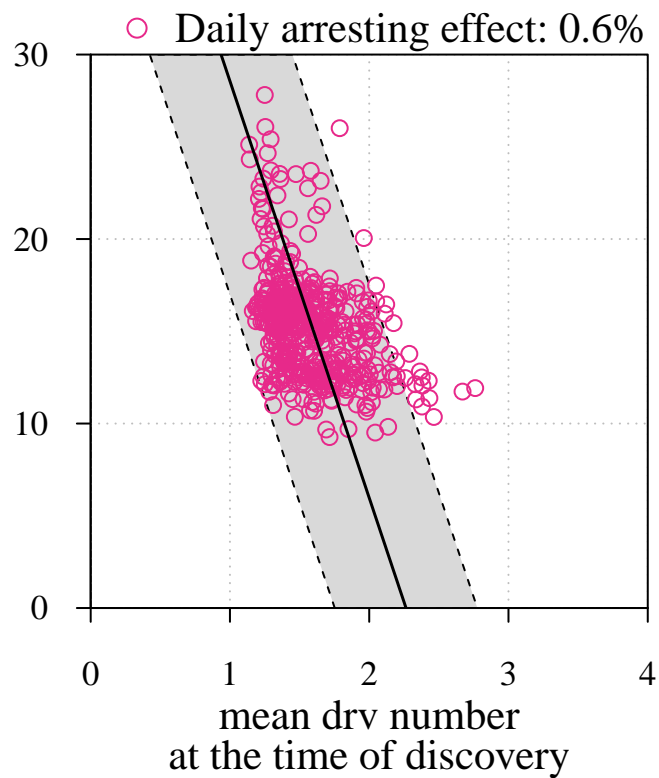

Supplement: supp [file elife-06266-supp-v1.zip › elife_poa_e06266_Figure_3_figure_supplement_4.pdf]

A

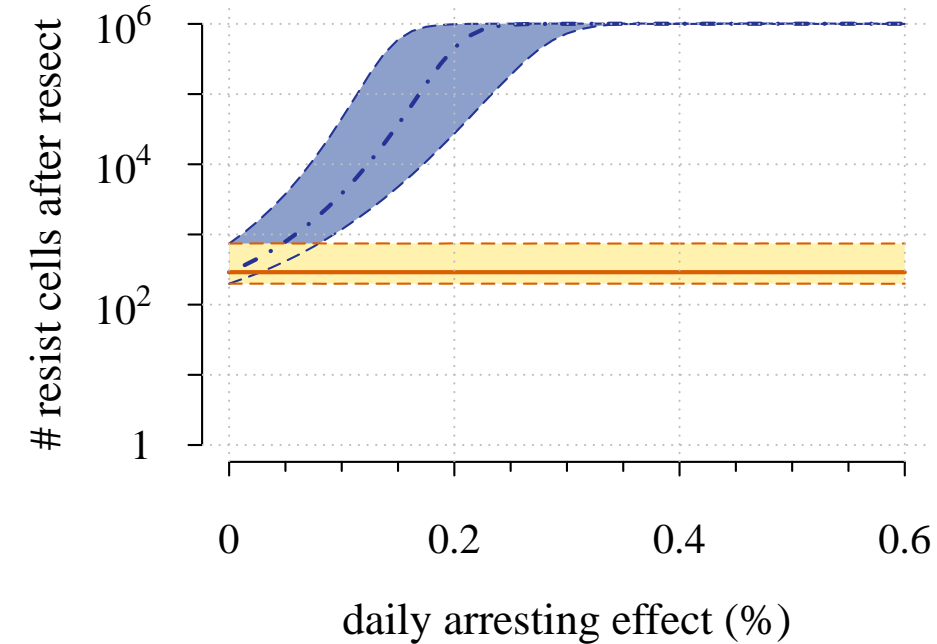

B

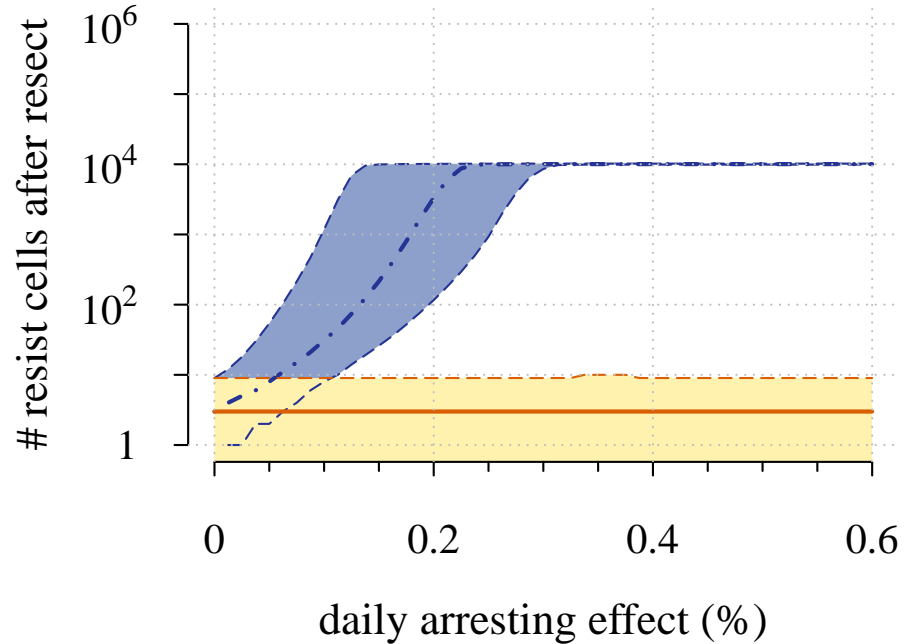

Supplement: supp [file elife-06266-supp-v1.zip › elife_poa_e06266_Figure_5_figure_supplement_1.pdf]
